# Supplementary material
Source: PubMed Central journal article supplement (PMC3999921)

# Peptide intensities and fitted GMM

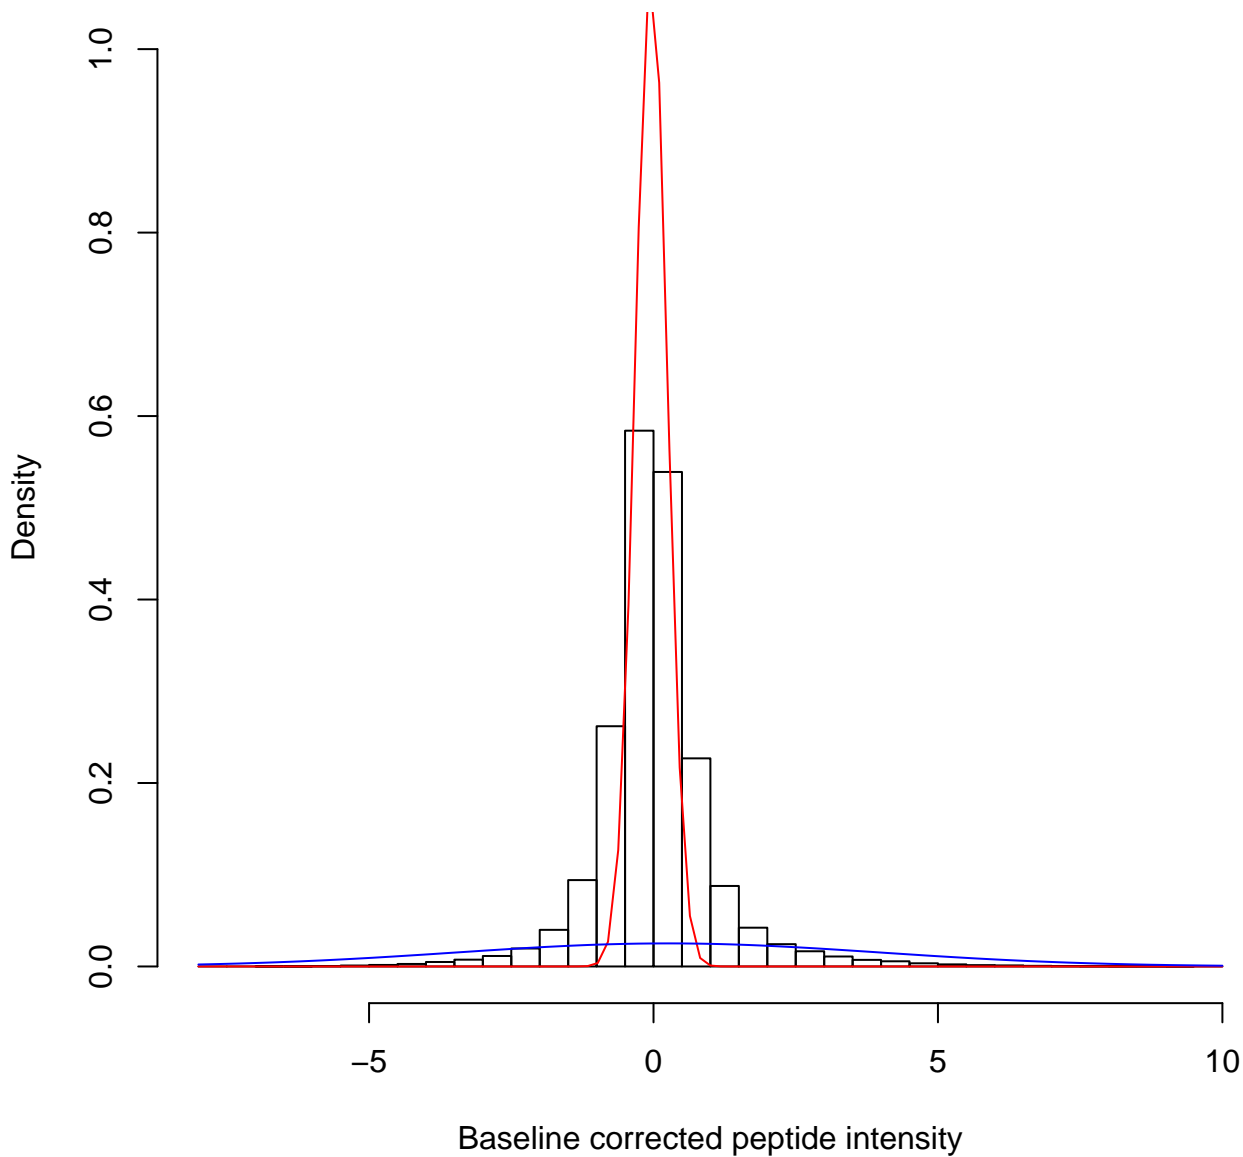

Supplement: NIHMS551986-supplement-01.pdf [file NIHMS551986-supplement-01.pdf]

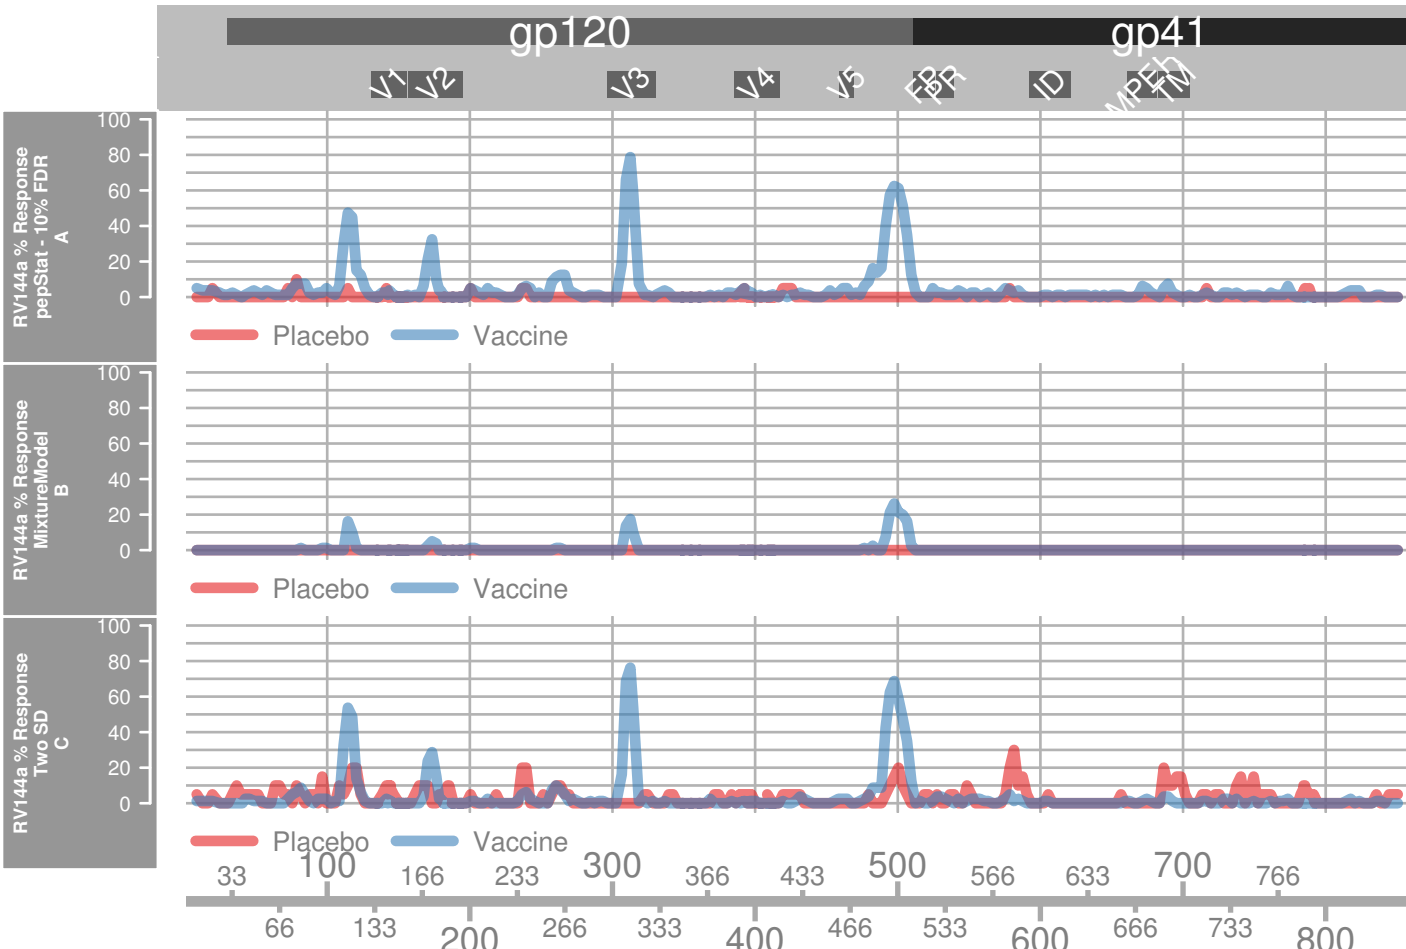

Supplement: NIHMS551986-supplement-02.pdf [file NIHMS551986-supplement-02.pdf]
